# Supplementary material for: Loss of Arp2/3 induces an NF-κB–dependent, nonautonomous effect on chemotactic signaling
Source: PubMed Central journal article supplement — J Cell Biol. 2013 Dec 23;203(6):907–16. doi: 10.1083/jcb.201306032 (PMC3871425; doi:10.1083/jcb.201306032), 2013-12-23
Supplement: supp_jcb.201306032_JCB_201306032_sm.pdf [file supp_jcb.201306032_JCB_201306032_sm.pdf]

Wu et al., <http://www.jcb.org/cgi/content/full/jcb.201306032/DC1>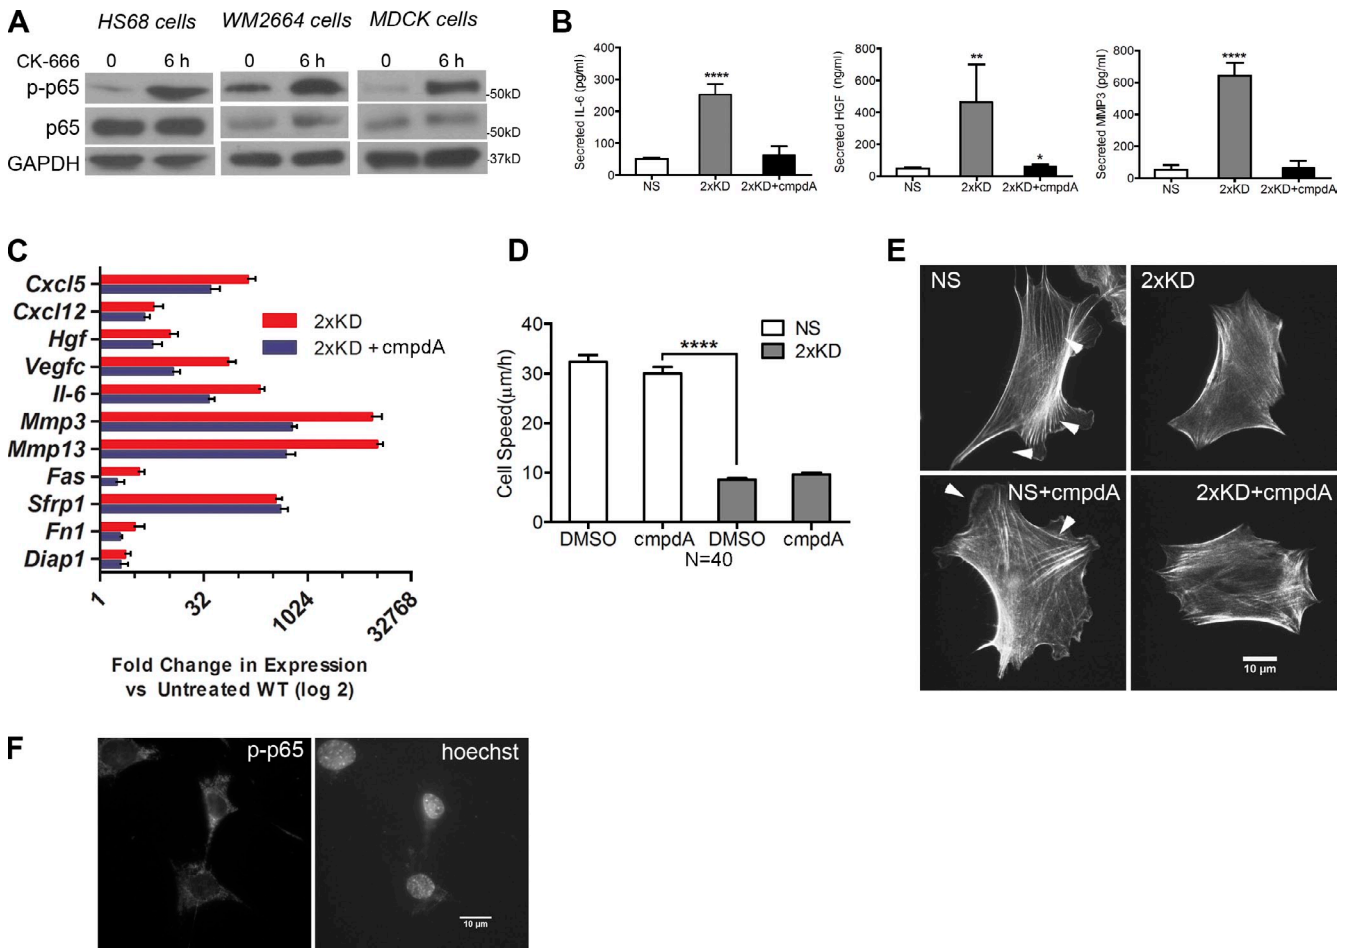

Figure S1. **NF- $\kappa$ B is activated in Arp2/3-inhibited cells and regulates the secretory phenotype in Arp2/3-deficient or -inhibited cells.** (A) Inhibition of Arp2/3 complex caused increased NF- $\kappa$ B activation in multiple cell lines. HS68 (human foreskin fibroblasts), WM2664 (human melanoma cells), and MDCK (epithelial cells) were treated with 100  $\mu$ M CK666 for 0 or 6 h before being lysed. Western blot showed p-p65, p65, and GAPDH levels in these three cell lines under the indicated treatment. (B) ELISAs showing secreted IL-6, HGF, and MMP3 levels in 2xKD cells with and without cmpdA treatment compared with NS cells. \*\*\*\*,  $P < 0.001$ ; \*\*,  $P < 0.01$  by Student's  $t$  test. (C) qRT-PCR showing the expression fold changes of the indicated genes compared with wild-type IA32 cells. 2xKD cells were treated with or without 5  $\mu$ M cmpdA for 12 h before being harvested for qRT-PCR. Fold changes were analyzed using Pfaffl method. (D) Graph showing cell speed of NS and 2xKD cells with 0.5% DMSO or 5  $\mu$ M cmpdA treatment.  $n = 40$  for each group. \*\*\*\*,  $P < 0.001$ . (E) Phalloidin staining showed F-actin in NS and 2xKD cells. Lamellipodia in NS cells were pointed out by white arrowheads. (F) Immunofluorescent images showing p65<sup>-/-</sup> MEFs stained with p-p65 and Hoechst. Error bars show 95% CI.

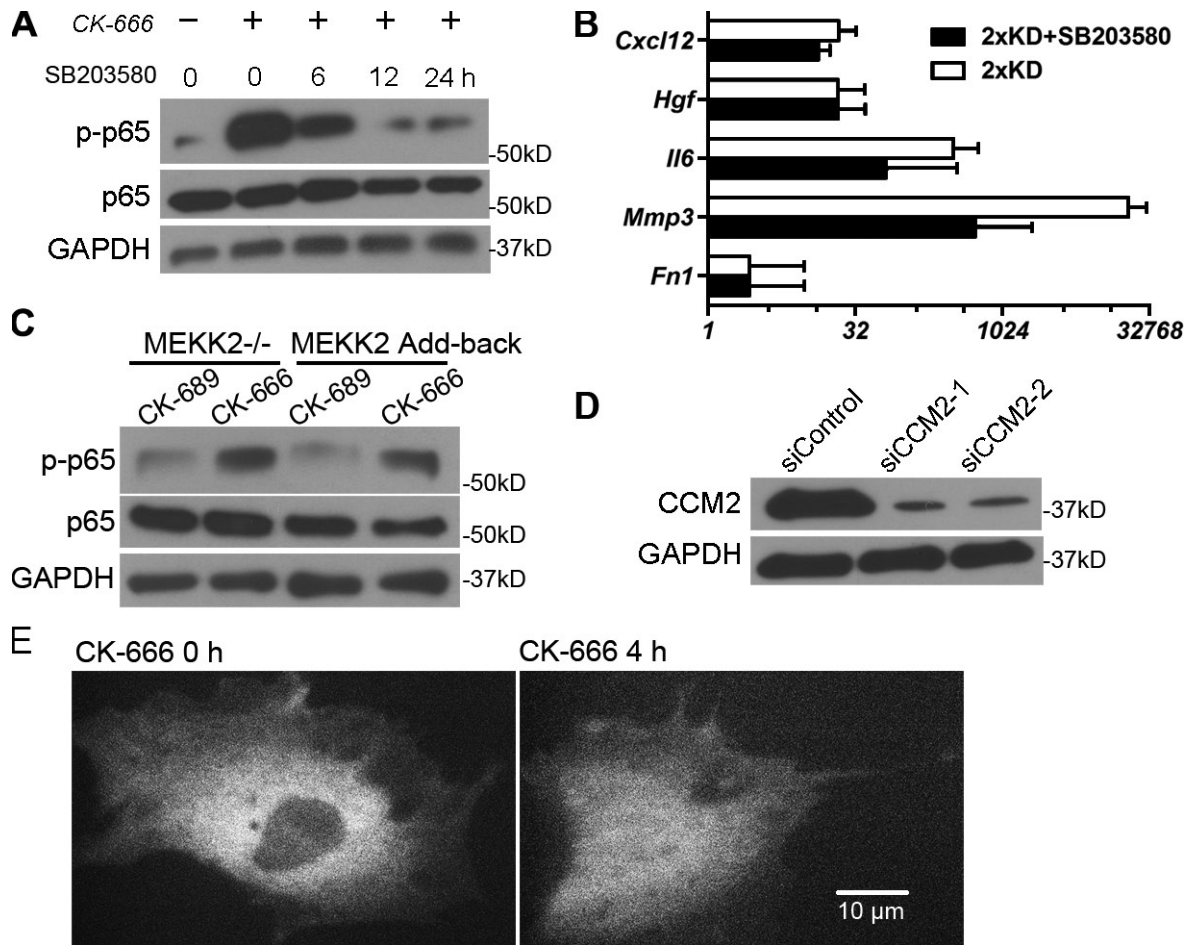

Figure S2. **p38 MAPK and the MEKK3-OSM complex are involved in the secretory phenotype in Arp2/3-deficient or -inhibited cells.** Video 1 shows a representative cell expressing Arp2-GFP (with Arp2 depletion) treated with sorbitol to induce hyperosmotic stress. (A) Preinhibition of p38 MAPK for >12 h abrogated the effect of Arp2/3 inhibition on NF- $\kappa$ B activation. IA32 cells were pretreated with 10  $\mu$ M p38 MAPK inhibitor SB203580 for the indicated times before adding 100  $\mu$ M CK666. p-p65, p65, and GAPDH were blotted. (B) qRT-PCR showing the expression fold changes of the indicated genes compared with wild-type IA32 cells. 2xKD cells were treated with or without 10  $\mu$ M SB203580 for 12 h before being harvested for qRT-PCR. Fold changes were analyzed using Pfaffl method. Error bars show 95% CI. (C) MEKK2 does not regulate loss of Arp2/3-induced NF- $\kappa$ B activation. MEKK2<sup>-/-</sup> or MEKK2<sup>-/-</sup>/MEKK2 add-back MEFs were treated with 100  $\mu$ M CK666 or its inactive control compound CK689 for 6 h before harvesting cells. p-p65, p65, and GAPDH were blotted. (D) CCM2 is effectively silenced using siRNA. IA32 cells treated with control siRNA (siControl) and two CCM2 siRNAs (siCCM2-1 and siCCM2-2) were harvested and blotted for CCM2 and GAPDH. (E) Fluorescent images showing a representative YPET-CCM2-expressing cell before (left) and after (right) 4 h of CK666 treatment.

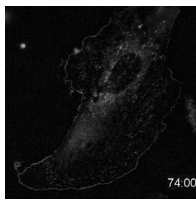

Video 1. **Representative cell expressing Arp2-GFP (with Arp2 depletion) treated with sorbitol to induce hyperosmotic stress.** Localization of Arp2-EGFP upon hyperosmotic shock IA32 cells stably expressing Arp2-EGFP were imaged every minute. Sorbitol-containing medium was added at 8 min as indicated to stress cells with hyperosmotic condition (0.25 M sorbitol). Images were captured using an inverted microscope (IX-81; Olympus) with a 60 $\times$ , 1.42 NA objective, a charge-coupled device camera (C4742-80-12AG; Hamamatsu Photonics), and an automated X-Y stage with MetaMorph imaging software.

**Table S1 is provided online as an Excel file and shows the RNA-Seq results of this study.**
